# Supplementary material for: Prediction of Bacteremia Based on 12-Year Medical Data Using a Machine Learning Approach: Effect of Medical Data by Extraction Time
Source: MDPI journal article supplement (doi:10.3390/diagnostics12010102), 2022-01-03
Supplement: s1 [file s1]

**Table S1. Top twenty bacterial strains identified in blood culture.**

| <b>Rank</b> | <b>Pathogen</b>                    | <b>Number</b> |
|-------------|------------------------------------|---------------|
| 1           | <i>Escherichia coli</i>            | 9,261         |
| 2           | <i>Staphylococcus aureus</i>       | 5,109         |
| 3           | <i>Klebsiella pneumoniae</i>       | 4,709         |
| 4           | <i>Enterococcus faecium</i>        | 4,577         |
| 5           | <i>Staphylococcus epidermidis</i>  | 3,201         |
| 6           | <i>Acinetobacter baumannii</i>     | 2,583         |
| 7           | <i>Pseudomonas aeruginosa</i>      | 1,694         |
| 8           | <i>Enterococcus faecalis</i>       | 1,366         |
| 9           | <i>Enterobacter cloacae</i>        | 636           |
| 10          | <i>Micrococcus spp.</i>            | 591           |
| 11          | <i>Staphylococcus hominis</i>      | 475           |
| 12          | <i>Bacteroides fragilis</i>        | 365           |
| 13          | <i>Staphylococcus capitis</i>      | 348           |
| 14          | <i>Enterobacter aerogenes</i>      | 344           |
| 15          | <i>Staphylococcus haemolyticus</i> | 327           |
| 16          | <i>Klebsiella oxytoca</i>          | 311           |
| 17          | <i>Serratia marcescens</i>         | 303           |
| 18          | <i>Bacillus spp.</i>               | 281           |
| 19          | <i>Citrobacter freundii</i>        | 247           |
| 20          | <i>Proteus mirabilis</i>           | 236           |

Number: the number of times that these pathogens were cultured

**Table S2. Baseline characteristic between bacteremia and non-bacteremia group using clinical data from 12-hours before blood culture tests.**

|                                     | Total                            |                                  |                 | Hospital A                       |                                 |                 | Hospital B                       |                                  |                 |
|-------------------------------------|----------------------------------|----------------------------------|-----------------|----------------------------------|---------------------------------|-----------------|----------------------------------|----------------------------------|-----------------|
|                                     | Bacteremia,<br>Yes<br>(n=77,357) | Bacteremia,<br>No<br>(n=260,691) | <i>P</i> -value | Bacteremia,<br>Yes<br>(n=16,112) | Bacteremia,<br>No<br>(n=40,002) | <i>P</i> -value | Bacteremia,<br>Yes<br>(n=61,245) | Bacteremia,<br>No<br>(n=220,689) | <i>P</i> -value |
| Age, years                          | 60.1 ± 13.9                      | 58.5 ± 14.7                      | <0.001          | 61.4 ± 13.4                      | 58.2 ± 15.6                     | <0.001          | 59.8 ± 14.0                      | 58.5 ± 14.6                      | <0.001          |
| Sex, male                           | 47,145 (60.1%)                   | 154,642 (59.3%)                  | <0.001          | 9,938 (61.7%)                    | 24,316(60.1%)                   | <0.001          | 37,207 (60.1%)                   | 130,326 (59.0%)                  | <0.001          |
| Vital Sign                          |                                  |                                  |                 |                                  |                                 |                 |                                  |                                  |                 |
| SBP, mmHg                           | 123.0 ± 22.3                     | 124.0 ± 21.5                     | 0.052           | 121.1 ± 25.0                     | 122.3 ± 23.9                    | 0.055           | 123.6 ± 21.5                     | 124.3 ± 21.0                     | <0.001          |
| DBP, mmHg                           | 70.0 ± 14.3                      | 71.6 ± 13.7                      | <0.001          | 67.5 ± 14.3                      | 70.2 ± 14.1                     | <0.001          | 70.6 ± 14.2                      | 71.9 ± 13.6                      | 0.021           |
| Body temperature, °C                | 37.1 ± 0.7                       | 37.1 ± 0.7                       | <0.001          | 36.9 ± 0.7                       | 36.9 ± 0.7                      | 0.089           | 37.1 ± 0.7                       | 37.1 ± 0.7                       | <0.001          |
| Heart rate, beats/min               | 95.2 ± 20.8                      | 90.9 ± 19.5                      | <0.001          | 96.7 ± 21.3                      | 92.5 ± 21.1                     | <0.001          | 94.8 ± 20.7                      | 90.6 ± 19.2                      | <0.001          |
| Respiratory rate, /min              | 20.2 ± 4.7                       | 19.8 ± 4.1                       | <0.001          | 20.2 ± 5.3                       | 19.3 ± 4.6                      | <0.001          | 20.2 ± 4.5                       | 19.9 ± 4.0                       | <0.001          |
| Hospital day, days                  | 19.7 ± 33.0                      | 10.6 ± 17.9                      | <0.001          | 21.1 ± 36.1                      | 7.0 ± 13.4                      | <0.001          | 19.3 ± 32.1                      | 11.2 ± 18.5                      | 0.001           |
| Laboratory data                     |                                  |                                  |                 |                                  |                                 |                 |                                  |                                  |                 |
| WBC, 10 <sup>3</sup> /μL            | 10.5 ± 9.2                       | 10.4 ± 9.4                       | 0.026           | 11.8 ± 7.9                       | 11.4 ± 7.7                      | 0.277           | 10.2 ± 9.5                       | 10.2 ± 9.7                       | <0.001          |
| Neutrophil, 10 <sup>3</sup> /μL     | 9.1 ± 7.3                        | 8.5 ± 6.0                        | 0.009           | 9.9 ± 7.3                        | 9.1 ± 6.4                       | <0.001          | 9.0 ± 7.4                        | 8.4 ± 5.9                        | <0.001          |
| Monocyte, 10 <sup>3</sup> /μL       | 0.4 ± 0.4                        | 0.5 ± 0.6                        | <0.001          | 0.5 ± 0.4                        | 0.7 ± 1.1                       | <0.001          | 0.4 ± 0.3                        | 0.5 ± 0.3                        | 0.081           |
| Hemoglobin, g/dL                    | 9.6 ± 1.9                        | 10.3 ± 2.1                       | <0.001          | 10.0 ± 1.9                       | 10.9 ± 2.4                      | <0.001          | 9.5 ± 1.9                        | 10.2 ± 2.0                       | <0.001          |
| Platelet count, 10 <sup>3</sup> /μL | 145.8 ± 128.4                    | 208.6 ± 138.6                    | <0.001          | 176.5 ± 136.2                    | 215.1 ± 127.4                   | <0.001          | 137.9 ± 125.1                    | 207.3 ± 140.7                    | <0.001          |
| ESR, mm/h                           | 50.2 ± 37.1                      | 52.7 ± 36.0                      | 0.008           | 48.3 ± 35.4                      | 46.6 ± 35.7                     | 0.127           | 50.8 ± 37.6                      | 53.9 ± 36.0                      | <0.001          |

|                           |                |               |        |               |               |        |                |               |        |
|---------------------------|----------------|---------------|--------|---------------|---------------|--------|----------------|---------------|--------|
| CRP, mg/L                 | 123.2 ± 95.9   | 84.3 ± 79.7   | <0.001 | 128.5 ± 90.0  | 91.7 ± 86.6   | <0.001 | 120.5 ± 98.7   | 81.8 ± 77.1   | <0.001 |
| Cholesterol, mg/dL        | 112.2 ± 48.6   | 127.5 ± 50.1  | <0.001 | 111.6 ± 48.4  | 135.2 ± 52.8  | <0.001 | 112.4 ± 48.7   | 124.8 ± 48.8  | <0.001 |
| Glucose, mg/dL            | 155.9 ± 100.3  | 146.7 ± 71.2  | <0.001 | 155.4 ± 79.3  | 152.3 ± 87.9  | 0.028  | 156.1 ± 106.3  | 145.0 ± 65.4  | <0.001 |
| BUN, mg/dL                | 33.9 ± 25.3    | 24.0 ± 19.1   | <0.001 | 34.0 ± 26.0   | 25.1 ± 20.2   | <0.001 | 33.9 ± 25.1    | 23.8 ± 18.8   | <0.001 |
| Creatinine, mg/dL         | 1.5 ± 1.6      | 1.3 ± 1.6     | <0.001 | 1.4 ± 1.4     | 1.4 ± 1.8     | 0.027  | 1.5 ± 1.6      | 1.3 ± 1.5     | <0.001 |
| Total protein, g/dL       | 5.4 ± 1.0      | 5.7 ± 1.0     | <0.001 | 5.7 ± 1.0     | 6.0 ± 1.0     | <0.001 | 5.4 ± 1.0      | 5.6 ± 0.9     | <0.001 |
| Albumin, g/dL             | 2.8 ± 0.6      | 3.0 ± 0.6     | <0.001 | 2.9 ± 0.6     | 3.3 ± 0.7     | <0.001 | 2.7 ± 0.6      | 3.0 ± 0.6     | <0.001 |
| Uric acid, mg/dL          | 4.3 ± 2.7      | 4.0 ± 2.4     | 0.007  | 4.1 ± 2.7     | 4.6 ± 2.6     | <0.001 | 4.3 ± 2.7      | 3.8 ± 2.3     | <0.001 |
| ALP, IU/L                 | 194.5 ± 247.6  | 129.2 ± 154.0 | <0.001 | 210.0 ± 267.6 | 136.1 ± 161.8 | <0.001 | 189.9 ± 241.2  | 127.2 ± 151.6 | <0.001 |
| AST, IU/L                 | 204.0 ± 1024.9 | 122.9 ± 650.5 | <0.001 | 178.1 ± 926.5 | 162.2 ± 877.1 | <0.001 | 211.1 ± 1050.1 | 113.0 ± 579.6 | <0.001 |
| ALT, IU/L                 | 102.1 ± 357.3  | 75.1 ± 283.1  | <0.001 | 96.9 ± 334.5  | 98.2 ± 400.0  | <0.001 | 103.6 ± 363.3  | 69.3 ± 244.8  | <0.001 |
| T. bilirubin, mg/dL       | 3.7 ± 6.0      | 1.8 ± 3.5     | <0.001 | 3.7 ± 6.0     | 1.8 ± 3.5     | <0.001 | 3.7 ± 5.9      | 1.7 ± 3.2     | <0.001 |
| Inorganic P, mg/dL        | 3.4 ± 1.6      | 3.3 ± 1.4     | 0.244  | 3.3 ± 1.4     | 3.5 ± 1.6     | 0.002  | 3.5 ± 1.6      | 3.3 ± 1.3     | <0.001 |
| Calcium, mg/dL            | 8.3 ± 0.9      | 8.3 ± 0.8     | 0.270  | 8.3 ± 1.0     | 8.3 ± 0.8     | 0.083  | 8.2 ± 0.9      | 8.3 ± 0.8     | 0.120  |
| Sodium, mmol/L            | 137.6 ± 6.3    | 137.7 ± 5.6   | 0.001  | 137.9 ± 6.6   | 137.3 ± 6.0   | 0.067  | 137.5 ± 6.2    | 137.8 ± 5.5   | <0.001 |
| Potassium, mmol/L         | 3.9 ± 0.8      | 3.9 ± 0.7     | <0.001 | 3.9 ± 0.7     | 4.0 ± 0.7     | <0.001 | 3.9 ± 0.8      | 3.9 ± 0.7     | <0.001 |
| Chloride, mmol/L          | 101.2 ± 6.5    | 101.7 ± 6.0   | <0.001 | 103.0 ± 6.6   | 102.8 ± 6.4   | 0.284  | 100.8 ± 6.4    | 101.4 ± 5.9   | 0.009  |
| tCO <sub>2</sub> , mmol/L | 22.7 ± 5.4     | 23.4 ± 4.7    | <0.001 | 23.5 ± 5.4    | 23.5 ± 5.1    | 0.248  | 22.5 ± 5.4     | 23.3 ± 4.5    | 0.146  |
| PT, sec                   | 16.4 ± 9.6     | 15.0 ± 7.1    | <0.001 | 17.1 ± 5.6    | 15.9 ± 7.8    | <0.001 | 16.2 ± 10.3    | 14.8 ± 7.0    | 0.206  |
| aPTT, sec                 | 42.8 ± 21.4    | 38.8 ± 19.3   | <0.001 | 46.7 ± 20.1   | 39.6 ± 18.1   | <0.001 | 41.9 ± 21.6    | 38.6 ± 19.6   | <0.001 |

Abbreviation, Hospital A, Sinchon Severance hospital; Hospital B, Gangnam Severance Hospital; SBP, systolic blood pressure; DBP, diastolic

blood pressure; WBC, white blood cell; ESR, erythrocyte sedimentation rate; CRP, C-reactive protein; BUN, blood urea nitrogen; ALP, alkaline

phosphatase; AST, aspartate transaminase; ALT, alanine transaminase; T. bilirubin, total bilirubin; P, phosphate; PT, prothrombin time; aPTT, activated partial thromboplastin time.
